# Supplementary material
Source: Springer Nature journal article supplement (https://www.springermedizin.de/resource/supplementary/12877_2014_1048_MOESM4_ESM.pdf/9440702)
Supplement: MOESM4 [file 9440702]

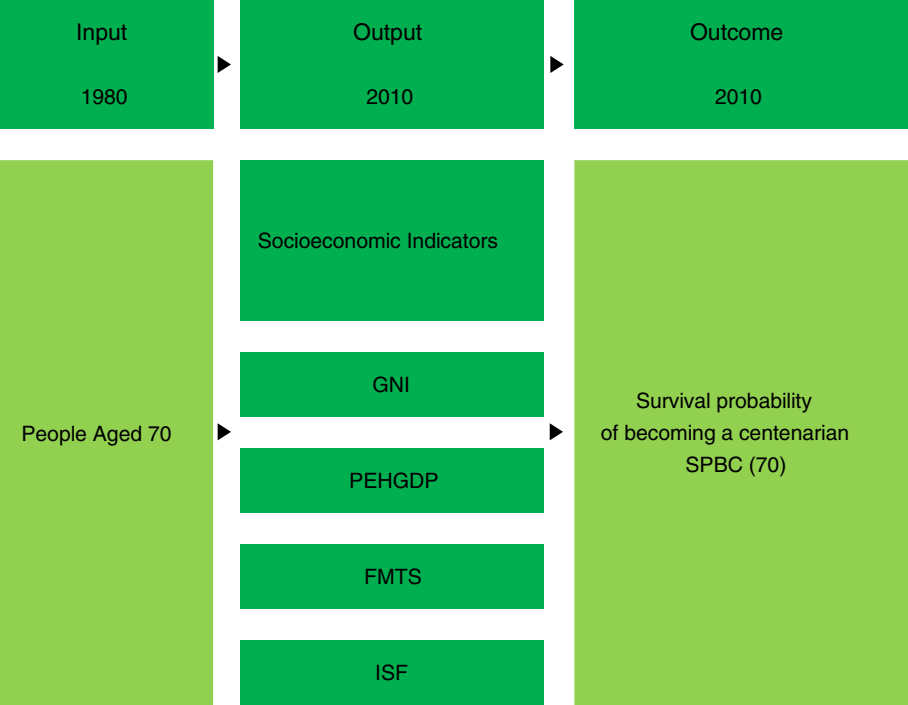

Input

1980

Output

2010

Outcome

2010

Socioeconomic Indicators

GNI

PEHGDP

FMTS

ISF

People Aged 70

Survival probability  
of becoming a centenarian  
SPBC (70)
